# Supplementary figures and images for: Dual functional rhodamine-immobilized silica toward sensing and extracting mercury ions in natural water samples
Source: Royal Society of Chemistry journal article supplement (doi:10.1039/c2dt11947a), 2012-01-01

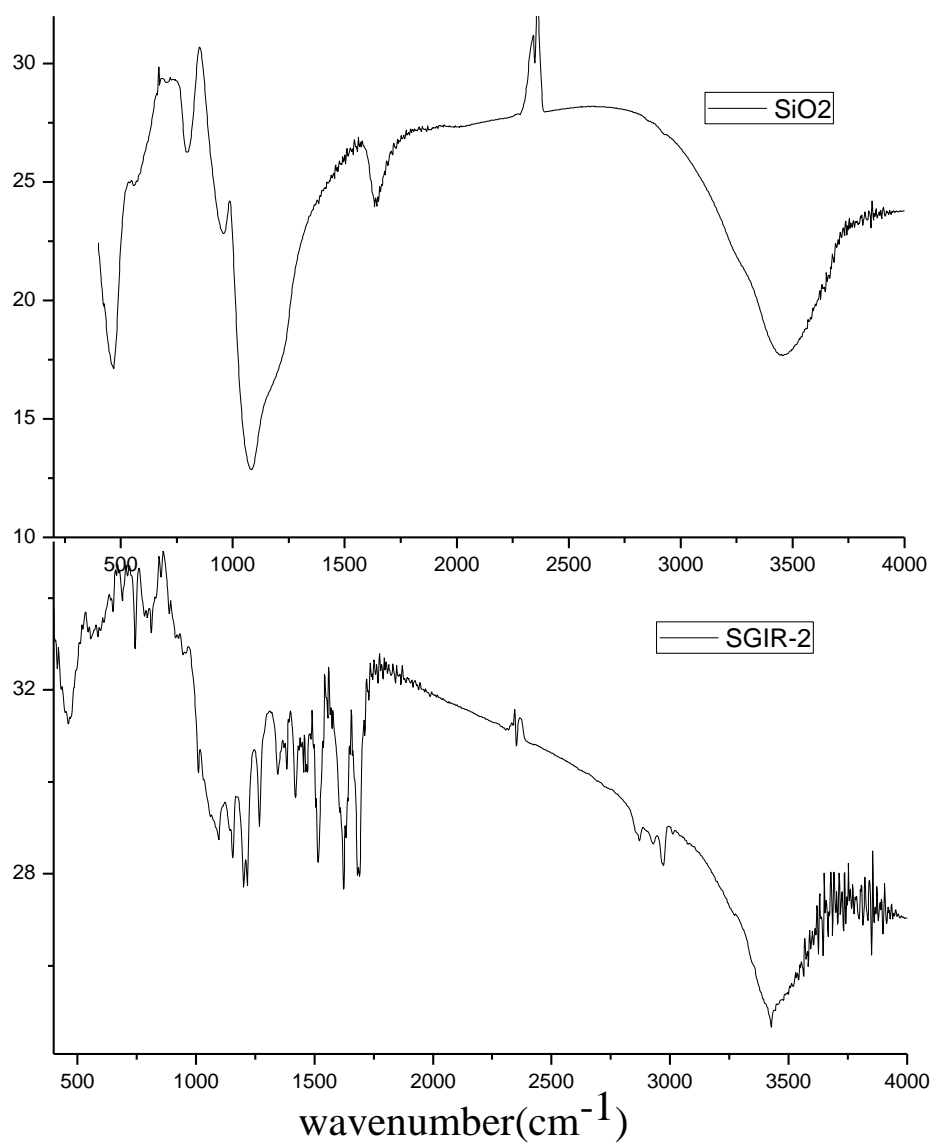

Figure S1. IR spectra of pure SiO<sub>2</sub> and **SGIR-2**.

Supplement: c2dt11947a.pdf [file c2dt11947a.pdf]
